# Supplementary material for: Tocilizumab in patients with anti-TNF refractory juvenile idiopathic arthritis-associated uveitis (APTITUDE): a multicentre, single-arm, phase 2 trial
Source: PubMed Central journal article supplement (PMC7134526; doi:10.1016/s2665-9913(20)30008-4), 2020-02-07
Supplement: mmc1.pdf [file mmc1.pdf]

# THE LANCET

## Rheumatology

### Supplementary appendix

This appendix formed part of the original submission and has been peer reviewed.  
We post it as supplied by the authors.

Supplement to: Ramanan AV, Dick AD, Guly C, et al. Tocilizumab in patients with anti-TNF refractory juvenile idiopathic arthritis-associated uveitis (APTITUDE): a multicentre, single-arm, phase 2 trial. *Lancet Rheumatol* 2019; published online Feb 7. [https://doi.org/10.1016/S2665-9913\(20\)30008-4](https://doi.org/10.1016/S2665-9913(20)30008-4).

Supplementary Figure 1: Schematic of Study Design

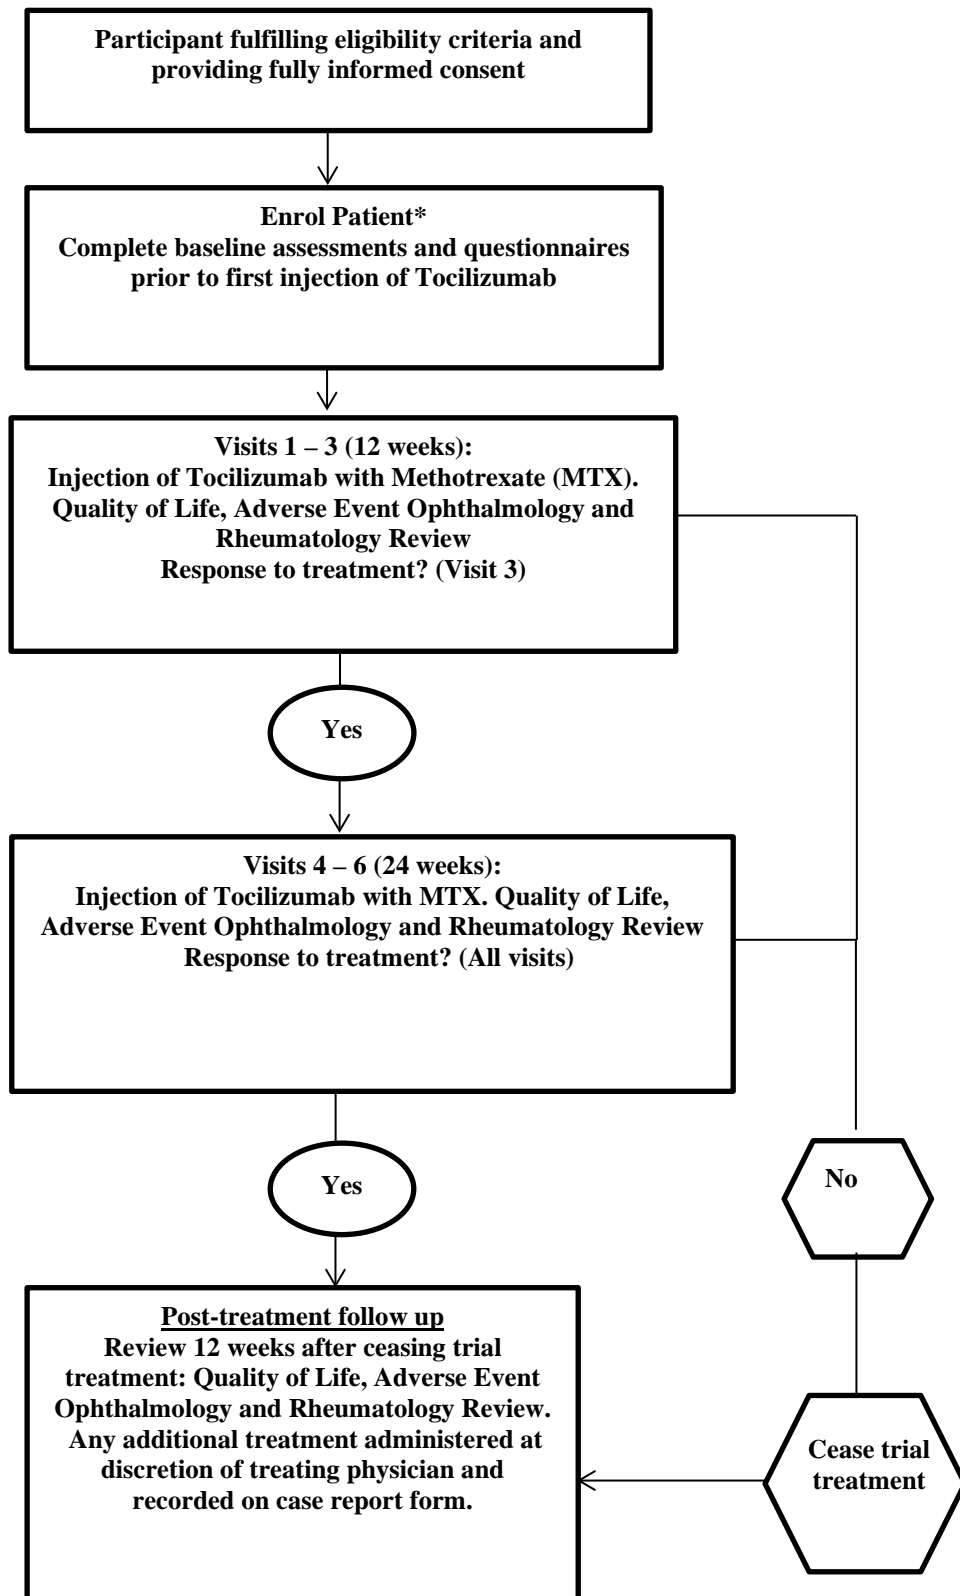

**Supplementary Table 1: Study visits and assessments**

| Assessment<br>(Procedure/ Activity)                                                                   | Screening | Baseline                  | Visit 1              | Visit 2              | Visit 3                    | Visit 4               | Visit 5               | Visit 6               | Visit 7               |
|-------------------------------------------------------------------------------------------------------|-----------|---------------------------|----------------------|----------------------|----------------------------|-----------------------|-----------------------|-----------------------|-----------------------|
| <b>Weeks</b>                                                                                          |           | 0<br>(-7/+7<br>days)      | 4<br>(-7/+7<br>days) | 8<br>(-7/+7<br>days) | 12<br>(-7/+7<br>days)      | 16<br>(-7/+7<br>days) | 20<br>(-7/+7<br>days) | 24<br>(-7/+7<br>days) | 36<br>(-7/+7<br>days) |
|                                                                                                       | Screening | Baseline/<br>Registration | Study Visit          | Study Visit          | Assessment<br>of endpoints | Study Visit           | Study Visit           | End of<br>treatment   | End of trial          |
| Written and informed consent                                                                          | X         |                           |                      |                      |                            |                       |                       |                       |                       |
| Confirm consent                                                                                       | X         | X                         | X                    | X                    | X                          | X                     | X                     | X                     | X                     |
| Assessment of eligibility criteria                                                                    | X         | X                         |                      |                      |                            |                       |                       |                       |                       |
| Review of Medical/ Ophthalmic/ Surgical<br>History                                                    | X         |                           |                      |                      |                            |                       |                       |                       |                       |
| Review of concomitant medications                                                                     | X         | X                         | X                    | X                    | X                          | X                     | X                     | X                     | X                     |
| Pregnancy test                                                                                        | X         |                           | X                    | X                    | X                          | X                     | X                     | X                     | X                     |
| Purified protein derivative Tuberculin Skin Test/<br>Test latent Tuberculosis as locally performed    | X         |                           |                      |                      |                            |                       |                       |                       |                       |
| Urinalysis                                                                                            | X         | X                         | X                    | X                    | X                          | X                     | X                     | X                     | X                     |
| Study intervention (Injection)                                                                        |           | X                         | X                    | X                    | X                          | X                     | X                     | X                     |                       |
| Compliance with study intervention                                                                    |           | X                         | X                    | X                    | X                          | X                     | X                     | X                     |                       |
| Physical Examination                                                                                  |           | X                         | X                    | X                    | X                          | X                     | X                     | X                     | X                     |
| Vital signs (heart and respiratory rate and blood<br>pressure)                                        | X         |                           | X                    | X                    | X                          | X                     | X                     | X                     | X                     |
| Height/ Weight                                                                                        | X         | X                         | X                    | X                    | X                          | X                     | X                     | X                     | X                     |
| Dispense treatment diary                                                                              |           | X                         | X                    | X                    | X                          | X                     | X                     | X                     |                       |
| Child Health Questionnaire                                                                            |           | X                         | X                    | X                    | X                          | X                     | X                     | X                     | X                     |
| Childhood Health Assessment Questionnaire                                                             |           | X                         | X                    | X                    | X                          | X                     | X                     | X                     | X                     |
| Haematological analysis                                                                               | X         | X*                        | X                    | X                    | X                          | X                     | X                     | X                     | X                     |
| Biochemical analysis                                                                                  | X         | X*                        | X                    | X                    | X                          | X                     | X                     | X                     | X                     |
| Anti-nuclear antibodies, double stranded<br>deoxyribonucleic acid and extractable nuclear<br>antigens |           | X                         |                      |                      |                            |                       |                       | X                     |                       |
| Samples for Biobank                                                                                   |           | X                         |                      |                      | X                          |                       |                       |                       | X                     |
| Vision Assessments <sup>#</sup>                                                                       | X         | X                         | X                    | X                    | X                          | X                     | X                     | X                     | X                     |
| Optical coherence tomography                                                                          | X         |                           | X                    | X                    | X                          | X                     | X                     | X                     | X                     |
| Anterior Chamber cells and flare assessment <sup>#</sup>                                              | X         | X                         | X                    | X                    | X                          | X                     | X                     | X                     | X                     |
| Assessment of vitritis and vitreous haze                                                              | X         |                           | X                    | X                    | X                          | X                     | X                     | X                     | X                     |
| Cataract scoring                                                                                      | X         |                           | X                    | X                    | X                          | X                     | X                     | X                     | X                     |
| Goldmann tonometry or tonopen/ICare                                                                   | X         |                           | X                    | X                    | X                          | X                     | X                     | X                     | X                     |
| Standard American College of Rheumatology<br>Pediatric Score Set Outcome Variables                    |           | X                         | X                    | X                    | X                          | X                     | X                     | X                     | X                     |
| Tanner Score                                                                                          |           | X                         |                      |                      | X                          |                       |                       | X                     | X                     |
| Assessments of Adverse and Serious Adverse<br>Events                                                  |           | X                         | X                    | X                    | X                          | X                     | X                     |                       |                       |

\* Biochemical and Haematological taken at screening can be used at baseline only if taken with 2 weeks of baseline visit.

<sup>#</sup> Tests do not need to be repeated if screening and baseline visit occurs on the same day.

**Supplementary Table 2: Exclusion Criteria**

| <b>Exclusion Criteria</b>                                                                                                                                                                                                                                                                                                                                               |                                                                                                                                                                                                                                                                                                                                                                                                                                                                                                                                                                                                                                                                   |
|-------------------------------------------------------------------------------------------------------------------------------------------------------------------------------------------------------------------------------------------------------------------------------------------------------------------------------------------------------------------------|-------------------------------------------------------------------------------------------------------------------------------------------------------------------------------------------------------------------------------------------------------------------------------------------------------------------------------------------------------------------------------------------------------------------------------------------------------------------------------------------------------------------------------------------------------------------------------------------------------------------------------------------------------------------|
| Uveitis without a diagnosis of Juvenile Idiopathic Arthritis (JIA) fulfilling International League of Associations for Rheumatology diagnostic criteria for JIA (all subgroups that have uveitis).                                                                                                                                                                      | Currently on Tocilizumab or has previously received Tocilizumab.                                                                                                                                                                                                                                                                                                                                                                                                                                                                                                                                                                                                  |
| Previous registration into the APTITUDE trial.                                                                                                                                                                                                                                                                                                                          | Participation in another clinical trial of investigational medicinal product within the last 4 weeks or 5 serum half-lives (whichever is longer) prior to registration.                                                                                                                                                                                                                                                                                                                                                                                                                                                                                           |
| More than 6 topical steroid eye drops per day per eye at time of registration (dose must be stable for 1 week prior to registration).                                                                                                                                                                                                                                   | For participants on Prednisolone or Prednisolone equivalent, change of dose within 4 weeks prior to registration.                                                                                                                                                                                                                                                                                                                                                                                                                                                                                                                                                 |
| Participants on Prednisone or Prednisone equivalent with a dose >0.2mg/kg per day.                                                                                                                                                                                                                                                                                      | No intraocular injection of disease modification agents including steroids and anti-VEGF within 4 weeks prior to registration.                                                                                                                                                                                                                                                                                                                                                                                                                                                                                                                                    |
| No intraocular surgery for previous 12 weeks prior to registration or expected/planned for duration of study.                                                                                                                                                                                                                                                           | Lack of recovery from recent surgery or surgery within 6 weeks at the time of registration.                                                                                                                                                                                                                                                                                                                                                                                                                                                                                                                                                                       |
| Intra-ocular pressure $\geq$ 25mm Hg at time of registration.                                                                                                                                                                                                                                                                                                           | Participants requiring systemic therapy with oral anti-glaucoma medication.                                                                                                                                                                                                                                                                                                                                                                                                                                                                                                                                                                                       |
| No disease modifying immunosuppressive drugs, other than MTX in the 4 weeks prior to registration                                                                                                                                                                                                                                                                       | History of active tuberculosis of less than 24 weeks treatment.                                                                                                                                                                                                                                                                                                                                                                                                                                                                                                                                                                                                   |
| Latent Tuberculosis not successfully treated for at least 4 weeks prior to registration (a test for latent tuberculosis infection must be performed within 12 weeks prior to registration).                                                                                                                                                                             | Auto-immune, rheumatic disease or overlap syndrome other than JIA.                                                                                                                                                                                                                                                                                                                                                                                                                                                                                                                                                                                                |
| Females who are pregnant, lactating, or intending to become pregnant during trial.                                                                                                                                                                                                                                                                                      | Known human immunodeficiency virus infection or other condition characterized by a compromised immune system.                                                                                                                                                                                                                                                                                                                                                                                                                                                                                                                                                     |
| Any history of alcohol or drug abuse within 24 weeks prior to registration.                                                                                                                                                                                                                                                                                             | Any active acute, sub-acute, chronic, or recurrent bacterial, viral, systemic fungal, infection or any major episode of infection requiring hospitalisation or treatment with IV antibiotics within 4 weeks of registration or treatment with oral antibiotics within 2 weeks of registration.                                                                                                                                                                                                                                                                                                                                                                    |
| History of reactivation or new onset of a systemic infection such as herpes zoster or Epstein-Barr virus within 8 weeks prior to registration.                                                                                                                                                                                                                          | Hepatitis B surface antigen or hepatitis C antibody positivity or chronic viral or autoimmune hepatitis.                                                                                                                                                                                                                                                                                                                                                                                                                                                                                                                                                          |
| History of concurrent serious gastrointestinal disorders.                                                                                                                                                                                                                                                                                                               | Evidence of current serious uncontrolled concomitant cardiovascular (including hyperlipidaemia), nervous system, pulmonary (including obstructive pulmonary disease), renal and hepatic disease.                                                                                                                                                                                                                                                                                                                                                                                                                                                                  |
| History of or current cancer or lymphoma.                                                                                                                                                                                                                                                                                                                               | Persistently poorly controlled severe hypertension (>95th percentile for height / age).                                                                                                                                                                                                                                                                                                                                                                                                                                                                                                                                                                           |
| Uncontrolled diabetes mellitus.                                                                                                                                                                                                                                                                                                                                         | History of severe allergic or anaphylactic reactions to human, humanized or murine monoclonal antibodies.                                                                                                                                                                                                                                                                                                                                                                                                                                                                                                                                                         |
| No live attenuated vaccines (including seasonal nasal vaccine, varicella vaccine for shingles or chickenpox, measles, mumps and rubella (MMR) or MMR varicella, oral polio vaccine and vaccines for yellow fever, measles, mumps or rubella) 4 weeks prior to registration, throughout the duration of the trial and for 8 weeks following the last dose of study drug. | Previous treatment with any cell-depleting therapies, including investigational agents or approved therapies.                                                                                                                                                                                                                                                                                                                                                                                                                                                                                                                                                     |
| Treatment with intravenous gamma globulin or plasmapheresis within 24 weeks of registration                                                                                                                                                                                                                                                                             | Any previous treatment with alkylating agents such as chlorambucil, or with total lymphoid irradiation                                                                                                                                                                                                                                                                                                                                                                                                                                                                                                                                                            |
| Any significant medical or surgical condition that would risk the participant's safety or their ability to complete the trial                                                                                                                                                                                                                                           | Any joint injections within 4 weeks prior to registration                                                                                                                                                                                                                                                                                                                                                                                                                                                                                                                                                                                                         |
| Any psychological condition that in the opinion of the principal investigator would interfere with safe completion of the trial                                                                                                                                                                                                                                         | Demonstrations of clinically significant deviations from the following laboratory parameters:<br><br>Serum creatinine > 1.5 $\times$ the upper limit of normal (ULN) for age and sex<br>Aspartate Aminotransferase Test or ALT > 1.5 $\times$ the ULN for age and sex<br>Total bilirubin > 1.3 mg/dL (>23 $\mu$ mol/L)<br>Platelet count < 150 $\times$ 10 <sup>3</sup> / $\mu$ L (< 150,000/mm <sup>3</sup> ) (< 150 $\times$ 10 <sup>9</sup> /L)<br>Haemoglobin < 7.0 g/dL (< 4.3 mmol/L)<br>White blood cell count < 5,000/mm <sup>3</sup> (< 5.0 $\times$ 10 <sup>9</sup> /L)<br>Neutrophil count < 2,500/mm <sup>3</sup> (< 2.5 $\times$ 10 <sup>9</sup> /L) |

**Supplementary Table 3: Trial Secondary Outcomes**

| Secondary Outcome                                                                            | Further Details                                                                                                                                                                                                                                                                                                                                                                                                                                                                                                                                                                                                                                                                                                                                  |
|----------------------------------------------------------------------------------------------|--------------------------------------------------------------------------------------------------------------------------------------------------------------------------------------------------------------------------------------------------------------------------------------------------------------------------------------------------------------------------------------------------------------------------------------------------------------------------------------------------------------------------------------------------------------------------------------------------------------------------------------------------------------------------------------------------------------------------------------------------|
| Adverse Events, Serious Adverse Events and Adverse Events of Special Interest                | <p>The following adverse events were of special interest:</p> <ul style="list-style-type: none"> <li><input type="checkbox"/> Serious and/or medically significant infections</li> <li><input type="checkbox"/> Myocardial infarction/acute coronary syndrome</li> <li><input type="checkbox"/> Gastrointestinal perforations</li> <li><input type="checkbox"/> Malignancies</li> <li><input type="checkbox"/> Anaphylaxis/Hypersensitivity reactions</li> <li><input type="checkbox"/> Demyelinating disorders</li> <li><input type="checkbox"/> Stroke</li> <li><input type="checkbox"/> Serious and/or medically significant bleeding events</li> <li><input type="checkbox"/> Serious and/or medically significant hepatic events</li> </ul> |
| Laboratory parameters                                                                        | Haematological and biochemical analysis and urinalysis measured during study period and follow up.                                                                                                                                                                                                                                                                                                                                                                                                                                                                                                                                                                                                                                               |
| Tolerability and compliance                                                                  | Participant diaries and dosing records determined tolerability and compliance throughout the trial treatment period                                                                                                                                                                                                                                                                                                                                                                                                                                                                                                                                                                                                                              |
| Total oral corticosteroid dose                                                               | Recorded during study period and follow up                                                                                                                                                                                                                                                                                                                                                                                                                                                                                                                                                                                                                                                                                                       |
| Reduction in and rate of systemic corticosteroid dose from entry dose                        | Time to reduction to 0mg and <5mg. Recorded during study period and follow up                                                                                                                                                                                                                                                                                                                                                                                                                                                                                                                                                                                                                                                                    |
| Topical corticosteroid use (frequency) compared to usage at registration.                    | Time to reduction to <2 drops and 0 drops. Recorded during study period and follow up                                                                                                                                                                                                                                                                                                                                                                                                                                                                                                                                                                                                                                                            |
| Visual acuity                                                                                | Measured by Age-appropriate Logarithm of the Minimum Angle of resolution assessment                                                                                                                                                                                                                                                                                                                                                                                                                                                                                                                                                                                                                                                              |
| Number of participants with resolution of associated optic nerve or macular oedema           | Assessed by slit lamp bio microscopy or optical coherence tomography                                                                                                                                                                                                                                                                                                                                                                                                                                                                                                                                                                                                                                                                             |
| Number of patients who are able to reduce topical or systemic agents for ocular hypertension |                                                                                                                                                                                                                                                                                                                                                                                                                                                                                                                                                                                                                                                                                                                                                  |

| <b>Secondary Outcome</b>                                                                                                                                                                                       | <b>Further Details</b>                                                                                                                                                                                                                                                       |
|----------------------------------------------------------------------------------------------------------------------------------------------------------------------------------------------------------------|------------------------------------------------------------------------------------------------------------------------------------------------------------------------------------------------------------------------------------------------------------------------------|
| Number of participants with disease control                                                                                                                                                                    | Defined as zero cells, with topical treatment at 12 weeks treatment visit and 24 weeks treatment visit                                                                                                                                                                       |
| Number of participants entering disease remission                                                                                                                                                              | Defined as zero cells, without topical treatment at 12 and 24 weeks treatment visit                                                                                                                                                                                          |
| Duration of sustaining inactive disease                                                                                                                                                                        | Defined as the length of time with zero cells, with or without topical treatment                                                                                                                                                                                             |
| Failure to reduce eye drops to 2 drops/day by or at the 12 weeks visit                                                                                                                                         |                                                                                                                                                                                                                                                                              |
| Quality of Life                                                                                                                                                                                                | Measured using the Childhood Health Questionnaire <sup>18</sup> and Childhood Health Assessment Questionnaire <sup>19</sup>                                                                                                                                                  |
| American College of Rheumatology (ACR) Pedi core set criteria <sup>20</sup> : at ACR30, ACR50, ACR70, ACR90 and ACR100 levels                                                                                  |                                                                                                                                                                                                                                                                              |
| Number of participants requiring change in biologic / Disease-modifying anti-rheumatic drugs (DMARDs) therapy due to disease flare of their arthritis or failure to respond to treatment for their arthritis.  |                                                                                                                                                                                                                                                                              |
| Number of participants undergoing flare of arthritis <sup>21</sup> , in remission on and off medication of their Juvenile Idiopathic Arthritis <sup>22</sup> and with minimum disease activity <sup>23</sup> . |                                                                                                                                                                                                                                                                              |
| Participants score of the Juvenile Arthritis Disease Activity Score (JADAS) <sup>18</sup> .                                                                                                                    | The JADAS comprises four components <sup>18</sup> : physician global assessment of disease activity <sup>19</sup> parent/patient global assessment of well-being <sup>20</sup> active joint count, in 27, 71 or 10 joints; and <sup>21</sup> erythrocyte sedimentation rate. |

**Supplementary Table 4: Summary of Non-eligibility**

| Eligibility Criteria                                                                                                      | Number of Patients Not Meeting Criteria |
|---------------------------------------------------------------------------------------------------------------------------|-----------------------------------------|
| Does not have active anterior uveitis ( 2 readings >1+ or more in the preceding 6 weeks)                                  | 17 (53.1%)                              |
| Participant has not been on a stable dose of MTX for at least 4 weeks prior to screening visit.                           | 1 (3.1%)                                |
| Biologic agent has not been discontinued according to the timelines specified                                             | 3 (9.4%)                                |
| Not able to commence the trial treatment within 2 weeks of screening                                                      | 3 (9.4%)                                |
| Participation in another clinical trial of Investigation Medicinal Product (IMP) within 4 weeks or 5 serum half- lives    | 1 (3.1%)                                |
| Topical steroid eye drops dose has not been stable for 1 week prior to registration                                       | 2 (6.3%)                                |
| Patient requires systemic therapy with oral anti-glaucoma medication                                                      | 1 (3.1%)                                |
| History of severe allergic or anaphylactic reactions to human, humanized or murine monoclonal antibodies                  | 2 (6.3%)                                |
| Any significant medical or surgical condition that would risk the patient's safety or their ability to complete the trial | 1 (3.1%)                                |
| Joint injections within 4 weeks prior to registration                                                                     | 1 (3.1%)                                |
| Demonstrations of clinically significant deviations in laboratory parameters                                              | 4 (12.5%)                               |
| Other (No reason provided and needed eye injection)                                                                       | 2 (6.3%)                                |

**Supplementary Table 5: Baseline ocular data**

| Baseline ocular data                                                             | Summary              | Ocular baseline data – eye level*<br>Tocilizumab (N=29) | Ocular baseline data – best eye**<br>Tocilizumab (N=21) | Ocular baseline data – worst eye***<br>Tocilizumab (N=21) |
|----------------------------------------------------------------------------------|----------------------|---------------------------------------------------------|---------------------------------------------------------|-----------------------------------------------------------|
| <b>Topical steroid drops</b>                                                     | Missing              | 1                                                       | 1                                                       | 1                                                         |
|                                                                                  | Mean (SD)            | 2.6 (1.4)                                               | 2.6 (1.5)                                               | 2.7 (1.4)                                                 |
|                                                                                  | Median (IQR)         | 3 (1, 4)                                                | 3 (1, 4)                                                | 3 (1.5, 4)                                                |
|                                                                                  | (Min, Max)           | (0, 5)                                                  | (0, 5)                                                  | (0, 5)                                                    |
| <b>Logarithm of the Minimum Angle of Resolution (LogMAR) score</b>               | Mean (SD)            | 0.1 (0.3)                                               | 0.1 (0.2)                                               | 0.2 (0.3)                                                 |
|                                                                                  | Median (IQR)         | 0 (-0.1, 0.2)                                           | 0 (-0.1, 0.2)                                           | 0.1 (0, 0.2)                                              |
|                                                                                  | (Min, Max)           | (-0.1, 1.2)                                             | (-0.1, 0.5)                                             | (-0.1, 1.2)                                               |
| <b>Anterior Chamber (AC) cells Standardization of Uveitis Nomenclature (SUN)</b> | 1+                   | 6 (20.7%)                                               | 5 (23.8%)                                               | 5 (23.8%)                                                 |
|                                                                                  | 2+                   | 9 (31%)                                                 | 7 (33.3%)                                               | 5 (23.8%)                                                 |
|                                                                                  | 3+                   | 11 (37.9%)                                              | 6 (28.6%)                                               | 8 (38.1%)                                                 |
|                                                                                  | 4+                   | 3 (10.3%)                                               | 3 (14.3%)                                               | 3 (14.3%)                                                 |
| <b>Flare score (SUN)</b>                                                         | 0                    | 4 (13.8%)                                               | 3 (14.3%)                                               | 2 (9.5%)                                                  |
|                                                                                  | 1+                   | 21 (72.4%)                                              | 15 (71.4%)                                              | 16 (76.2%)                                                |
|                                                                                  | 2+                   | 4 (13.8%)                                               | 3 (14.3%)                                               | 3 (14.3%)                                                 |
| <b>Lens Opacities Classification System (LOCS) III Grading: Pseudophakic</b>     | No                   | 25 (86.2%)                                              | 18 (85.7%)                                              | 18 (85.7%)                                                |
|                                                                                  | Yes                  | 4 (13.8%)                                               | 3 (14.3%)                                               | 3 (14.3%)                                                 |
| <b>LOCS III Grading: Nuclear</b>                                                 | Not done             | 4                                                       | 3                                                       | 3                                                         |
|                                                                                  | N0                   | 24 (96%)                                                | 17 (94.4%)                                              | 17 (94.4%)                                                |
|                                                                                  | NI                   | 1 (4%)                                                  | 1 (5.6%)                                                | 1 (5.6%)                                                  |
| <b>LOCS III Grading: Cortical</b>                                                | Not done             | 4                                                       | 3                                                       | 3                                                         |
|                                                                                  | No Cortical Cataract | 24 (96%)                                                | 18 (100%)                                               | 17 (94.4%)                                                |
|                                                                                  | CI                   | 1 (4%)                                                  | 0 (0%)                                                  | 1 (5.6%)                                                  |
| <b>LOCS III Grading: Posterior</b>                                               | Not done             | 4                                                       | 3                                                       | 3                                                         |
|                                                                                  | 0                    | 24 (96%)                                                | 17 (94.4%)                                              | 17 (94.4%)                                                |
|                                                                                  | PI                   | 1 (4%)                                                  | 1 (5.6%)                                                | 1 (5.6%)                                                  |

| Baseline ocular data                                                             | Summary      | Ocular baseline data – eye level*<br>Tocilizumab (N=29) | Ocular baseline data – best eye**<br>Tocilizumab (N=21) | Ocular baseline data – worst eye***<br>Tocilizumab (N=21) |
|----------------------------------------------------------------------------------|--------------|---------------------------------------------------------|---------------------------------------------------------|-----------------------------------------------------------|
| <b>Other Structural Changes: Central band-keratopathy – covering visual axis</b> | No           | 28 (96.6%)                                              | 21 (100%)                                               | 20 (95.2%)                                                |
|                                                                                  | Yes          | 1 (3.4%)                                                | 0 (0%)                                                  | 1 (4.8%)                                                  |
| <b>Other Structural Changes: Sychiae</b>                                         | No           | 25 (86.2%)                                              | 17 (81%)                                                | 17 (81%)                                                  |
|                                                                                  | Yes          | 4 (13.8%)                                               | 4 (19%)                                                 | 4 (19%)                                                   |
| <b>Other Structural Changes: Iris bombe</b>                                      | No           | 29 (100%)                                               | 21 (100%)                                               | 21 (100%)                                                 |
| <b>Other Structural Changes: Membrane formation</b>                              | No           | 28 (96.6%)                                              | 20 (95.2%)                                              | 20 (95.2%)                                                |
|                                                                                  | Yes          | 1 (3.4%)                                                | 1 (4.8%)                                                | 1 (4.8%)                                                  |
| <b>Other Structural Changes: Neovascularisation</b>                              | No           | 29 (100%)                                               | 21 (100%)                                               | 21 (100%)                                                 |
| <b>Intraocular pressure (IOP)</b>                                                | Mean (SD)    | 13.8 (3.2)                                              | 13.8 (3.5)                                              | 14.4 (3)                                                  |
|                                                                                  | Median (IQR) | 13 (12, 16)                                             | 13 (11, 16)                                             | 13.5 (12.7, 16.5)                                         |
|                                                                                  | (Min, Max)   | (8, 21)                                                 | (8, 21)                                                 | (10, 21)                                                  |

\* Eye level – Patients that entered the trial with two eligible eyes have both eyes included in these summaries.

\*\* Best eye – Patients that entered the trial with two eligible eyes have the best score/scenario included in these summaries at the patient level.

\*\*\* Worst eye – Patients that entered the trial with two eligible eyes have the worst score/scenario included in these summaries at the patient level.

**Supplementary Table 6: Baseline rheumatoid data**

| Baseline rheumatoid data                                                           | Summary                   | Tocilizumab (N=21) |
|------------------------------------------------------------------------------------|---------------------------|--------------------|
| <b>Type of JIA (International League Against Rheumatism (ILAR) classification)</b> | Extended oligoarthritis   | 6 (28.6%)          |
|                                                                                    | Persistent oligoarthritis | 7 (33.3%)          |
|                                                                                    | Polyarthritis RF negative | 7 (33.3%)          |
|                                                                                    | Psoriatic arthritis       | 1 (4.8%)           |
| <b>Disease duration (years)</b>                                                    | Mean (SD)                 | 9 (4.4)            |
|                                                                                    | Median (IQR)              | 9.8 (5, 12.1)      |
|                                                                                    | (Min, Max)                | (0.5, 15.5)        |
| <b>Physician global assessment of disease activity</b>                             | Mean (SD)                 | 2 (2)              |
|                                                                                    | Median (IQR)              | 1.6 (0.2, 3)       |
|                                                                                    | (Min, Max)                | (0, 7.5)           |
| <b>Active joint count [all joints]</b>                                             | Mean (SD)                 | 0.9 (1.7)          |
|                                                                                    | Median (IQR)              | 0 (0, 1)           |
|                                                                                    | (Min, Max)                | (0, 6)             |
| <b>Swollen joint count [all joints]</b>                                            | Mean (SD)                 | 1.1 (1.9)          |
|                                                                                    | Median (IQR)              | 0 (0, 1)           |
|                                                                                    | (Min, Max)                | (0, 6)             |
| <b>Anti-nuclear antibody (ANA)</b>                                                 | Not done                  | 1                  |
|                                                                                    | Negative                  | 5 (25%)            |
|                                                                                    | Positive                  | 15 (75%)           |
| <b>Double-stranded deoxyribonucleic acid (DsDNA)</b>                               | Negative                  | 18 (85.7%)         |
|                                                                                    | Positive                  | 3 (14.3%)          |
| <b>Extractable nuclear antigen (ENA)</b>                                           | Not done                  | 4                  |
|                                                                                    | Negative                  | 16 (94.1%)         |



| Baseline rheumatoid data | Summary  | Tocilizumab (N=21) |
|--------------------------|----------|--------------------|
|                          | Positive | 1 (5.9%)           |

**Supplementary Table 7: Adverse Events**

| System Organ Class                                   | Preferred Term                      | Events [Patients] (% of patients) |
|------------------------------------------------------|-------------------------------------|-----------------------------------|
| <b>Total</b>                                         | <b>Total</b>                        | <b>175 [20] (95.2%)</b>           |
| Blood and lymphatic system disorders                 | Increased tendency to bruise        | 1 [1] (4.8%)                      |
|                                                      | Lymphadenopathy                     | 1 [1] (4.8%)                      |
|                                                      | Neutropenia                         | 3 [1] (4.8%)                      |
| Congenital, familial and genetic disorders           | Syringomyelia                       | 1 [1] (4.8%)                      |
| Ear and labyrinth disorders                          | Ear pain                            | 2 [1] (4.8%)                      |
| Eye disorders                                        | Eyelid oedema                       | 1 [1] (4.8%)                      |
|                                                      | Ocular hyperaemia                   | 2 [2] (9.5%)                      |
|                                                      | Uveitis                             | 3 [3] (14.3%)                     |
|                                                      | Vision blurred                      | 3 [2] (9.5%)                      |
|                                                      | Visual acuity reduced               | 1 [1] (4.8%)                      |
| Gastrointestinal disorders                           | Abdominal discomfort                | 2 [2] (9.5%)                      |
|                                                      | Constipation                        | 1 [1] (4.8%)                      |
|                                                      | Diarrhoea                           | 2 [2] (9.5%)                      |
|                                                      | Gastroesophageal reflux disease     | 1 [1] (4.8%)                      |
|                                                      | Mouth ulceration                    | 4 [2] (9.5%)                      |
|                                                      | Oral pain                           | 1 [1] (4.8%)                      |
|                                                      | Toothache                           | 1 [1] (4.8%)                      |
|                                                      | Vomiting                            | 3 [3] (14.3%)                     |
| General disorders and administration site conditions | Complication associated with device | 1 [1] (4.8%)                      |
|                                                      | Injection site bruising             | 1 [1] (4.8%)                      |
|                                                      | Injection site reaction             | 24 [8] (38.1%)                    |
|                                                      | Pyrexia                             | 1 [1] (4.8%)                      |
| Immune system disorders                              | Hypersensitivity                    | 1 [1] (4.8%)                      |
|                                                      | Seasonal allergy                    | 1 [1] (4.8%)                      |
| Infections and infestations                          | Cellulitis                          | 1 [1] (4.8%)                      |
|                                                      | Cystitis                            | 1 [1] (4.8%)                      |
|                                                      | Ear infection                       | 1 [1] (4.8%)                      |
|                                                      | Molluscum contagiosum               | 1 [1] (4.8%)                      |
|                                                      | Nasopharyngitis                     | 3 [2] (9.5%)                      |
|                                                      | Oral herpes                         | 1 [1] (4.8%)                      |
|                                                      | Otitis externa                      | 1 [1] (4.8%)                      |
|                                                      | Paronychia                          | 4 [2] (9.5%)                      |
|                                                      | Skin infection                      | 1 [1] (4.8%)                      |

|                                                 |                                             |               |
|-------------------------------------------------|---------------------------------------------|---------------|
|                                                 | Tonsillitis                                 | 1 [1] (4.8%)  |
|                                                 | Tooth abscess                               | 1 [1] (4.8%)  |
|                                                 | Upper respiratory tract infection           | 3 [3] (14.3%) |
|                                                 | Urinary tract infection                     | 2 [2] (9.5%)  |
|                                                 | Viral upper respiratory tract infection     | 1 [1] (4.8%)  |
|                                                 | Vulvovaginal candidiasis                    | 1 [1] (4.8%)  |
|                                                 | Wound infection                             | 1 [1] (4.8%)  |
| Injury, poisoning and procedural complications  | Head injury                                 | 1 [1] (4.8%)  |
|                                                 | Ligament sprain                             | 2 [2] (9.5%)  |
|                                                 | Suture related complication                 | 1 [1] (4.8%)  |
|                                                 | Wound                                       | 1 [1] (4.8%)  |
| Investigations                                  | Alanine aminotransferase increased          | 4 [3] (14.3%) |
|                                                 | Aspartate aminotransferase increased        | 1 [1] (4.8%)  |
|                                                 | Blood bilirubin increased                   | 1 [1] (4.8%)  |
|                                                 | Blood calcium decreased                     | 1 [1] (4.8%)  |
|                                                 | Blood cholesterol increased                 | 1 [1] (4.8%)  |
|                                                 | Blood triglycerides increased               | 3 [3] (14.3%) |
|                                                 | High density lipoprotein decreased          | 1 [1] (4.8%)  |
|                                                 | Intraocular pressure increased              | 4 [1] (4.8%)  |
|                                                 | Low density lipoprotein increased           | 1 [1] (4.8%)  |
|                                                 | Neutrophil count                            | 1 [1] (4.8%)  |
|                                                 | Neutrophil count decreased                  | 4 [3] (14.3%) |
|                                                 | Red blood cell sedimentation rate increased | 2 [2] (9.5%)  |
|                                                 | White blood cell count decreased            | 1 [1] (4.8%)  |
| Musculoskeletal and connective tissue disorders | Arthralgia                                  | 8 [4] (19.0%) |
|                                                 | Back pain                                   | 3 [2] (9.5%)  |
|                                                 | Joint range of motion decreased             | 1 [1] (4.8%)  |
|                                                 | Joint swelling                              | 2 [2] (9.5%)  |
|                                                 | Juvenile idiopathic arthritis               | 1 [1] (4.8%)  |
|                                                 | Scoliosis                                   | 1 [1] (4.8%)  |
|                                                 | Temporomandibular joint syndrome            | 1 [1] (4.8%)  |
|                                                 | Tenosynovitis                               | 1 [1] (4.8%)  |
| Nervous system disorders                        | Dizziness                                   | 1 [1] (4.8%)  |
|                                                 | Headache                                    | 8 [5] (23.8%) |
|                                                 | Syncope                                     | 2 [2] (9.5%)  |
| Reproductive system and breast disorders        | Dysmenorrhoea                               | 5 [2] (9.5%)  |
|                                                 | Hypomenorrhoea                              | 1 [1] (4.8%)  |
|                                                 | Menorrhagia                                 | 1 [1] (4.8%)  |
| Respiratory, thoracic and mediastinal disorders | Cough                                       | 7 [5] (23.8%) |
|                                                 | Nasal congestion                            | 1 [1] (4.8%)  |
|                                                 | Oropharyngeal pain                          | 7 [6] (28.6%) |
|                                                 | Wheezing                                    | 2 [1] (4.8%)  |

|                                        |                        |              |
|----------------------------------------|------------------------|--------------|
| Skin and subcutaneous tissue disorders | Acne                   | 1 [1] (4.8%) |
|                                        | Eczema                 | 1 [1] (4.8%) |
|                                        | Erythema               | 1 [1] (4.8%) |
|                                        | Rash                   | 1 [1] (4.8%) |
|                                        | Skin burning sensation | 1 [1] (4.8%) |
| Surgical and medical procedures        | Tooth extraction       | 1 [1] (4.8%) |

**Supplementary Table 8: Adverse Events of Special Interest**

| System Organ Class                                          | Preferred Term          | Events [Patients] (% of patients) |
|-------------------------------------------------------------|-------------------------|-----------------------------------|
| <b>Total</b>                                                | <b>Total</b>            | <b>21 [7] (33.3%)</b>             |
| <b>General disorders and administration site conditions</b> | Injection site reaction | 19 [6] (28.6%)                    |
| <b>Immune system disorders</b>                              | Hypersensitivity        | 1 [1] (4.8%)                      |
| <b>Skin and subcutaneous tissue disorders</b>               | Skin burning sensation  | 1 [1] (4.8%)                      |

**Supplementary Table 9: Corticosteroid use – Total oral corticosteroid dose**

| Time period                                | Number registered | Received oral corticosteroids* | Total oral corticosteroid dose (mg) | Total time on study treatment – months | Total oral dose (mg) standardised to per patient year (95% CI) |
|--------------------------------------------|-------------------|--------------------------------|-------------------------------------|----------------------------------------|----------------------------------------------------------------|
| Duration of treatment period               | 21                | 4                              | 1683.21                             | 68.40                                  | 295.29 (263.46, 330.97)                                        |
| Duration of treatment period and follow-up | 21                | 6                              | 4458.21                             | 129.87                                 | 411.93 (374.01, 453.69)                                        |

\* Received oral corticosteroids at any point during time period.

**Supplementary Table 10: Corticosteroid use – Time to reduction to 0mg**

| Time period                                | Number registered | Number included in analysis* | Number reaching 0mg | Median time to reduction (IQR) |
|--------------------------------------------|-------------------|------------------------------|---------------------|--------------------------------|
| Duration of treatment period               | 21                | 4                            | 0                   | NA                             |
| Duration of treatment period and follow-up | 21                | 4                            | 0                   | NA                             |

\* Only patients that received oral corticosteroids at any point during time period were included in the analysis.  
NA: Median time to reduction not reached.

**Supplementary Table 11: Corticosteroid use – Time to reduction to 5mg**

| Time period                                | Number registered | Number included in analysis* | Number reaching <5mg | Median time to reduction in days (IQR) |
|--------------------------------------------|-------------------|------------------------------|----------------------|----------------------------------------|
| Duration of treatment period               | 21                | 3                            | 0                    | NA                                     |
| Duration of treatment period and follow-up | 21                | 3                            | 0                    | NA                                     |

\* Only patients that were receiving steroid eye drops at time of registration were included in the analysis.  
NA: Median time to reduction not reached.

**Supplementary Table 12: Steroid eye drop use – Time to reduction to <2 drops**

| Time period                                | Number registered | Number included in analysis* | Number reaching <2 drops | Median time to reduction in days (IQR) |
|--------------------------------------------|-------------------|------------------------------|--------------------------|----------------------------------------|
| Duration of treatment period               | 21                | 18                           | 3                        | 84 (61, 117)                           |
| Duration of treatment period and follow-up | 21                | 18                           | 5                        | 117 (84, 140)                          |

\* Only patients that were receiving steroid eye drops at time of registration were included in the analysis.

**Supplementary Table 13: Steroid eye drop use – Time to reduction to 0 drops**

| Time period                                | Number registered | Number included in analysis* | Number reaching 0 drops | Median time to reduction in days (IQR) |
|--------------------------------------------|-------------------|------------------------------|-------------------------|----------------------------------------|
| Duration of treatment period               | 21                | 20                           | 3                       | 61 (42, 84)                            |
| Duration of treatment period and follow-up | 21                | 20                           | 4                       | 72.5 (51.5, 115)                       |

\* Only patients that were receiving steroid eye drops at time of registration were included in the analysis.

**Supplementary Table 14: Steroid eye drop use – Post hoc-analysis – Mean number of drops**

| Time point | Patients included* | Mean number of drops (SD) |
|------------|--------------------|---------------------------|
| Baseline   | 20                 | 4.48 (3.11)               |
| 12 weeks   | 15                 | 4.33 (2.29)               |
| 24 weeks   | 3                  | 3.67 (1.53)               |

\* Only patients that were receiving steroid eye drops at time of registration were included in the analysis.

**Supplementary Table 15: Visual acuity measured by age-appropriate LogMAR assessment – LogMAR Score at each time point**

| Visit    | Best score* |         |              |                     | Worst score** |         |             |                    |
|----------|-------------|---------|--------------|---------------------|---------------|---------|-------------|--------------------|
|          | n           | Missing | Mean (SD)    | Median (Range)      | n             | Missing | Mean (SD)   | Median (Range)     |
| Baseline | 21          | 0       | 0.07 (0.19)  | 0.02 (-0.13, 0.52)  | 21            | 0       | 0.17 (0.32) | 0.08 (-0.13, 1.20) |
| 4 weeks  | 20          | 1       | 0.04 (0.14)  | 0.00 (-0.18, 0.35)  | 20            | 1       | 0.08 (0.17) | 0.04 (-0.18, 0.40) |
| 8 weeks  | 19          | 0       | 0.03 (0.12)  | 0.00 (-0.15, 0.30)  | 19            | 0       | 0.14 (0.34) | 0.03 (-0.15, 1.40) |
| 12 weeks | 15          | 0       | -0.01 (0.17) | -0.05 (-0.30, 0.40) | 15            | 0       | 0.10 (0.31) | 0.00 (-0.30, 0.98) |
| 16 weeks | 6           | 0       | 0.04 (0.08)  | 0.05 (-0.08, 0.12)  | 6             | 0       | 0.06 (0.09) | 0.08 (-0.08, 0.16) |
| 20 weeks | 6           | 0       | 0.08 (0.06)  | 0.07 (0.00, 0.18)   | 6             | 0       | 0.12 (0.09) | 0.14 (0.00, 0.22)  |
| 24 weeks | 4           | 0       | 0.06 (0.11)  | 0.08 (-0.10, 0.16)  | 4             | 0       | 0.11 (0.15) | 0.13 (-0.10, 0.26) |

\* Best score – Patients that entered the trial with two eligible eyes have the best LogMAR score at each visit included in the analysis at the patient level.

\*\* Worst score – Patients that entered the trial with two eligible eyes have the worst LogMAR score at each visit included in the analysis at the patient level.

**Supplementary Table 16: Visual acuity measured by age-appropriate LogMAR assessment – Joint modelling of LogMAR score and time to treatment failure**

|                  | Parameter   | Best score* |               |         | Worst score** |              |         |
|------------------|-------------|-------------|---------------|---------|---------------|--------------|---------|
|                  |             | Estimate    | 95% CI        | p-value | Estimate      | 95% CI       | p-value |
| Primary analysis | Association | -2.23       | -32.96, 10.34 | 0.836   | -4.17         | -21.28, 0.41 | 0.457   |
|                  | Time        | 0.02        | -0.01, 0.05   | 0.193   | 0.01          | -0.02, 0.04  | 0.332   |

Note: Number of observations: 70; Number of subjects: 21; Number of subjects that fail: 15 (71.4%)

\* Best score – Patients that entered the trial with two eligible eyes have the best LogMAR score at each visit included in the analysis at the patient level.

\*\* Worst score – Patients that entered the trial with two eligible eyes have the worst LogMAR score at each visit included in the analysis at the patient level.

**Supplementary Table 17: Haematological and Biochemical assessment**

| Analysis*                        | Assessment                           | Number of abnormal clinically significant results during treatment and follow-up |
|----------------------------------|--------------------------------------|----------------------------------------------------------------------------------|
| Haematological                   | Haematocrit                          | 0                                                                                |
|                                  | Haemoglobin                          | 0                                                                                |
|                                  | Red blood cell count                 | 0                                                                                |
|                                  | White blood cell count               | 1 at 8 weeks                                                                     |
|                                  | Neutrophils                          | 1 at 4 weeks<br>3 at 8 weeks<br>2 at 12 weeks                                    |
|                                  | Lymphocytes                          | 0                                                                                |
|                                  | Monocytes                            | 0                                                                                |
|                                  | Basophils                            | 0                                                                                |
|                                  | Eosinophils                          | 0                                                                                |
|                                  | Platelet count                       | 0                                                                                |
|                                  | Erythrocyte sedimentation rate (ESR) | 3 at 0 weeks<br>1 at 8 weeks<br>1 at 36 weeks                                    |
|                                  | Plasma viscosity                     | 0                                                                                |
|                                  | Biochemical assessment               | C-reactive protein                                                               |
| Urea                             |                                      | 0                                                                                |
| Creatinine                       |                                      | 0                                                                                |
| Sodium                           |                                      | 0                                                                                |
| Potassium                        |                                      | 0                                                                                |
| Calcium                          |                                      | 1 at 20 weeks                                                                    |
| Inorganic Phosphate              |                                      | 0                                                                                |
| Glucose                          |                                      | 1 at 36 weeks                                                                    |
| Chloride                         |                                      | 0                                                                                |
| Bicarbonate                      |                                      | 0                                                                                |
| Total bilirubin                  |                                      | 0                                                                                |
| Alanine transaminase (ALT)       |                                      | 2 at 4 weeks<br>1 at 12 weeks                                                    |
| Aspartate aminotransferase (AST) |                                      | 1 at 4 weeks<br>1 at 12 weeks                                                    |

\* Analysed at 0, 4, 8, 12, 16, 20, 24 and 36 weeks.

**Supplementary Table 18: Urinalysis test results**

| Analysis   | Assessment                        | Number of abnormal results during treatment and follow-up                                                        | Number of abnormal clinically significant results during treatment and follow-up |
|------------|-----------------------------------|------------------------------------------------------------------------------------------------------------------|----------------------------------------------------------------------------------|
| Urinalysis | <b>Protein</b>                    | 2 at 0 weeks<br>3 at 4 weeks<br>4 at 8 weeks<br>3 at 12 weeks<br>1 at 24 weeks<br>2 at 36 weeks                  | NA                                                                               |
|            | <b>Glucose</b>                    | 0                                                                                                                | NA                                                                               |
|            | <b>Blood</b>                      | 2 at 0 weeks<br>4 at 4 weeks<br>1 at 8 weeks<br>1 at 12 weeks<br>2 at 24 weeks<br>2 at 36 weeks                  | NA                                                                               |
|            | <b>Leukocyte esterase</b>         | 3 at 0 weeks<br>4 at 4 weeks<br>1 at 8 weeks<br>3 at 12 weeks<br>2 at 24 weeks<br>4 at 36 weeks                  | NA                                                                               |
|            | <b>Specific gravity</b>           | 1 at 4 weeks<br>1 at 12 weeks                                                                                    | NA                                                                               |
|            | <b>Potential of hydrogen (pH)</b> | 1 at 12 weeks                                                                                                    | NA                                                                               |
|            | <b>Microscopic analysis</b>       | 2 at 0 weeks<br>5 at 4 weeks<br>2 at 8 weeks<br>3 at 12 weeks<br>2 at 20 weeks<br>1 at 24 weeks<br>2 at 36 weeks | 1 at 24 weeks                                                                    |

\* Analysed at 0, 4, 8, 12, 16, 20, 24 and 36 weeks.

NA: Data not collected.

**Supplementary Table 19: American College of Rheumatology (ACR) Pedi response**

| Visit           | ACR Pedi Response* | N (%)        | Missing** |
|-----------------|--------------------|--------------|-----------|
| <b>4 weeks</b>  |                    | N=13         |           |
|                 | <b>30</b>          | 6/12 (50%)   | 1         |
|                 | <b>50</b>          | 5/12 (41.7%) | 1         |
|                 | <b>70</b>          | 2/12 (16.7%) | 1         |
|                 | <b>90</b>          | 1/12 (8.3%)  | 1         |
|                 | <b>100</b>         | 0/12 (0%)    | 1         |
| <b>8 weeks</b>  |                    | N=12         |           |
|                 | <b>30</b>          | 7/12 (58.3%) | 0         |
|                 | <b>50</b>          | 6/12 (50%)   | 0         |
|                 | <b>70</b>          | 3/12 (25%)   | 0         |
|                 | <b>90</b>          | 0/12 (0%)    | 0         |
|                 | <b>100</b>         | 0/12 (0%)    | 0         |
| <b>12 weeks</b> |                    | N=9          |           |
|                 | <b>30</b>          | 5/9 (55.6%)  | 0         |
|                 | <b>50</b>          | 4/9 (44.4%)  | 0         |
|                 | <b>70</b>          | 4/9 (44.4%)  | 0         |
|                 | <b>90</b>          | 1/9 (11.1%)  | 0         |
|                 | <b>100</b>         | 1/9 (11.1%)  | 0         |
| <b>16 Weeks</b> |                    | N=4          |           |
|                 | <b>30</b>          | 3/4 (75%)    | 0         |
|                 | <b>50</b>          | 3/4 (75%)    | 0         |
|                 | <b>70</b>          | 2/4 (50%)    | 0         |
|                 | <b>90</b>          | 1/4 (25%)    | 0         |
|                 | <b>100</b>         | 0/4 (0%)     | 0         |
| <b>20 Weeks</b> |                    | N=4          |           |
|                 | <b>30</b>          | 3/4 (75%)    | 0         |
|                 | <b>50</b>          | 3/4 (75%)    | 0         |
|                 | <b>70</b>          | 2/4 (50%)    | 0         |
|                 | <b>90</b>          | 2/4 (50%)    | 0         |
|                 | <b>100</b>         | 2/4 (50%)    | 0         |
| <b>24 Weeks</b> |                    | N=2          |           |
|                 | <b>30</b>          | 2/2 (100%)   | 0         |
|                 | <b>50</b>          | 2/2 (100%)   | 0         |
|                 | <b>70</b>          | 1/2 (50%)    | 0         |
|                 | <b>90</b>          | 1/2 (50%)    | 0         |
|                 | <b>100</b>         | 0/2 (0%)     | 0         |

\* The ACR Paediatric 30, 50, 70, 90 and 100 levels (Giannini et al., 1997) are defined as 30%, 50%, 70%, 90% and 100% improvement respectively in a minimum of three out of 6 components in the core set with worsening of one variable by no more than 30% as defined in the ACR criteria. Patients that have 4-6 out of 6 components at baseline with the best possible score or missing data are unable to achieve an improvement at subsequent visits in a minimum of three out of 6 components so are excluded from this analysis (n=8).

\*\* Patient has missing data at this visit so ACR Pedi Response is unable to be calculated.

**Supplementary Table 20: Joint modelling of ACR data and time to treatment failure**

|        | Parameter   | Estimate | 95% CI*      | p-value |
|--------|-------------|----------|--------------|---------|
| ACR30  | Association | -1.44    | -3.77, -0.31 | 0.003   |
|        | Time        | -0.04    | -0.62, 0.43  | 0.950   |
| ACR50  | Association | -1.23    | -4.45, -0.13 | 0.006   |
|        | Time        | 0.25     | -0.23, 0.72  | 0.296   |
| ACR70  | Association | -1.64    | -5.36, 1.94  | 0.195   |
|        | Time        | 0.40     | -0.04, 0.79  | 0.071   |
| ACR90  | Association | -3.03    | Std.Err NaN  | <0.001  |
|        | Time        | 0.88     | 0.22, 1.66   | 0.011   |
| ACR100 | Association | 0.03     | -0.02, 0.09  | 0.253   |
|        | Time        | 16.99    | 12.90, 23.50 | <0.001  |

Note: Number of observations: 43; Number of subjects: 13; Number of events: 9 (69.2%)

\*Credible intervals, rather than confidence intervals, due to Bayesian approach

Std.Err NaN: Standard error not a number.

**Supplementary Table 21: Joint modelling of Juvenile Arthritis Disease Activity Score (JADAS) data and time to treatment failure**

| Parameter   | JADAS10  |             |         | JADAS27  |             |         | JADAS71  |             |         |
|-------------|----------|-------------|---------|----------|-------------|---------|----------|-------------|---------|
|             | Estimate | 95% CI      | p-value | Estimate | 95% CI      | p-value | Estimate | 95% CI      | p-value |
| Association | 0.14     | -0.64, 2.23 | 0.857   | 0.13     | -0.63, 2.18 | 0.868   | 0.14     | -0.64, 2.23 | 0.857   |
| Time        | -0.40    | -2.02, 1.72 | 0.701   | -0.36    | -1.88, 1.63 | 0.720   | -0.40    | -2.02, 1.72 | 0.701   |

Note: Number of observations: 27; Number of subjects: 10; Number of subjects that fail: 7 (70.0%)

Warning: For all JADAS outcomes note low numbers of subjects/observations. Some bootstrap models took various attempts before conversion. Treat results with caution.

**Supplementary Table 22: Childhood Health Questionnaire (CHQ) – Joint modelling of CHQ score and time to treatment failure**

| Parameter   | Physical |              |         | Psychosocial |             |         |
|-------------|----------|--------------|---------|--------------|-------------|---------|
|             | Estimate | 95% CI       | p-value | Estimate     | 95% CI      | p-value |
| Association | -0.07    | -0.31, -0.03 | 0.318   | -0.06        | -0.25, 0.10 | 0.546   |
| Time        | -1.55    | -3.68, 0.04  | 0.086   | 0.14         | -0.67, 0.82 | 0.695   |

Note: Number of observations: 63; Number of subjects: 20; Number of subjects that fail: 14 (70.0%)

**Supplementary Table 23: Childhood Health Assessment Questionnaire (CHAQ) – Joint modelling of CHAQ score and time to treatment failure**

| Parameter   | Estimate | 95% CI      | p-value |
|-------------|----------|-------------|---------|
| Association | 3.11     | 1.63, 8.36  | 0.165   |
| Time        | 0.01     | -0.05, 0.05 | 0.839   |

Note: Number of observations: 71; Number of subjects: 21; Number of subjects that fail: 15 (71.4%)

**Supplementary Table 24: Number of participants requiring change in biologic /disease-modifying anti-rheumatic drugs (DMARDs) therapy due to disease flare of their arthritis or failure to respond to treatment of arthritis**

| Treatment   | Number registered | Number requiring change in biologic / DMARDs therapy due to failure to respond from arthritis, N (%) |
|-------------|-------------------|------------------------------------------------------------------------------------------------------|
| Tocilizumab | 21                | 5 (23.81%)                                                                                           |

**Supplementary Table 25: Number of participants undergoing flare of arthritis (worsening of 30% or more in 3 or more of the 6 variables of the JIA core set , with no more than one variable improving by 30% or more)**



| Treatment visit             |                        |                                  |
|-----------------------------|------------------------|----------------------------------|
|                             | Number of participants | Number with disease flare, N (%) |
| Overall (at least one case) | 21                     | 0 (0%)                           |
| Baseline                    | 21                     | 0 (0%)                           |
| 4 weeks                     | 21                     | 0 (0%)                           |
| 8 weeks                     | 19                     | 0 (0%)                           |
| 12 Weeks                    | 15                     | 0 (0%)                           |
| 16 Weeks                    | 6                      | 0 (0%)                           |
| 20 Weeks                    | 6                      | 0 (0%)                           |
| 24 Weeks                    | 4                      | 0 (0%)                           |

**Supplementary Table 26: Number of participants in remission on and off medication of their JIA**

|                       | Not on medication for at least 6 months, N (%) | On medication for at least 6 months, N (%) | Achieved clinical remission of JIA whilst on medication, N (%) |
|-----------------------|------------------------------------------------|--------------------------------------------|----------------------------------------------------------------|
| Main analysis         | 3 (14.3%)                                      | 18 (85.7%)                                 | 0 (0%)                                                         |
| Sensitivity analysis* | 3 (14.3%)                                      | 18 (85.7%)                                 | 0 (0%)                                                         |
| Additional analysis** | 7 (33.3%)                                      | 14 (66.7%)                                 | 0 (0%)                                                         |

\* “ESR or C-reactive protein (CRP) values just outside the normal range which are not deemed to be clinically significant are nothing to be concerned with in terms of the care for the patient. Therefore, we will undertake a sensitivity analysis to classify ‘abnormal but not clinically significant’ ESR and CRP values as ‘normal’ in the definition of inactive disease of their JIA.”

\*\* “‘Number of participants in remission on and off medication of their arthritis’ will be analysed as per ‘Number of participants in remission on and off medication of their JIA (Wallace, 2004)’ with the criteria in the Wallace (2004) paper that apply to uveitis omitted to only use those that apply to arthritis. The criteria to be omitted are as follows (i) active uveitis and (ii) anti-uveitis medications.”

**Supplementary Table 27: Number of participants with minimum disease activity**

| Treatment visit             |                                                     |                                             |
|-----------------------------|-----------------------------------------------------|---------------------------------------------|
|                             | Number with Oligoarticular JIA or Polyarticular JIA | Number with minimum disease activity, N (%) |
| Overall (at least one case) | 20                                                  | 0 (0%)                                      |
| Baseline                    | 20                                                  | 0 (0%)                                      |
| 4 weeks                     | 20                                                  | 0 (0%)                                      |
| 8 weeks                     | 18                                                  | 0 (0%)                                      |
| 12 weeks                    | 14                                                  | 0 (0%)                                      |
| 16 weeks                    | 5                                                   | 0 (0%)                                      |
| 20 weeks                    | 5                                                   | 0 (0%)                                      |
| 24 weeks                    | 3                                                   | 0 (0%)                                      |
| 36 weeks                    | 0                                                   | 0 (0%)                                      |

**Supplementary Table 28: Foveal Thickness**

| Visit           | Best score |         |               |                     | Worst score |         |               |                     |
|-----------------|------------|---------|---------------|---------------------|-------------|---------|---------------|---------------------|
|                 | n          | Missing | Mean (SD)     | Median (Range)      | n           | Missing | Mean (SD)     | Median (Range)      |
| <b>Baseline</b> | 20         | 1       | 278.6 (67.68) | 257.5 (219.0,524.0) | 20          | 1       | 281.7 (68.87) | 262.0 (219.0,524.0) |
| <b>4 weeks</b>  | 19         | 2       | 267.4 (32.48) | 267.0 (192.0,333.0) | 19          | 2       | 269.0 (32.52) | 271.0 (196.0,333.0) |
| <b>8 weeks</b>  | 18         | 1       | 262.9 (39.06) | 265.0 (179.0,319.0) | 18          | 1       | 269.6 (36.65) | 269.0 (193.0,342.0) |
| <b>12 weeks</b> | 13         | 2       | 260.9 (54.13) | 270.0 (140.0,350.0) | 13          | 2       | 280.9 (46.54) | 286.0 (197.0,392.0) |
| <b>16 weeks</b> | 5          | 1       | 272.2 (44.90) | 293.0 (192.0,294.0) | 5           | 1       | 305.6 (91.63) | 294.0 (196.0,451.0) |
| <b>20 weeks</b> | 5          | 1       | 256.8 (46.95) | 271.0 (187.0,300.0) | 5           | 1       | 263.0 (43.12) | 280.0 (195.0,300.0) |
| <b>24 weeks</b> | 3          | 1       | 257.7 (51.73) | 285.0 (198.0,290.0) | 3           | 1       | 258.3 (50.58) | 285.0 (200.0,290.0) |

\* Best score – Patients that entered the trial with two eligible eyes have the best Foveal Thickness score at each visit included in the analysis at the patient level.

\*\* Worst score – Patients that entered the trial with two eligible eyes have the worst Foveal Thickness score at each visit included in the analysis at the patient level.

**Supplementary Table 29: Summary per participant**

| Improvement                           | Patient number | Trial status for the full 6m treatment phase                                                                         | Visit used*                          | Days from registration date to date used | Biologics used prior to registration              | MTX dose – Prior to screening | Eligible eye(s) | Eye   | Drops - Baseline | Drops – 12 weeks* | AC cells score - Baseline | AC cells score – 12 weeks* | Foveal thickness - Baseline | Foveal thickness - 12 weeks* |
|---------------------------------------|----------------|----------------------------------------------------------------------------------------------------------------------|--------------------------------------|------------------------------------------|---------------------------------------------------|-------------------------------|-----------------|-------|------------------|-------------------|---------------------------|----------------------------|-----------------------------|------------------------------|
| <b>Responders<sup>1</sup></b>         | 1              | Completed 6m treatment                                                                                               | 12 week visit                        | 83                                       | Infliximab <sup>#</sup> ; Adalimumab <sup>#</sup> | 12.5 mg/m <sup>2</sup>        | Both eyes       | Right | 6                | 2                 | 2+                        | 0.5+                       | 245                         | 197                          |
|                                       |                |                                                                                                                      |                                      |                                          |                                                   |                               |                 | Left  | 6                | 2                 | 2+                        | 0.5+                       | 245                         | 196                          |
|                                       | 2              | Withdrew from treatment prior to 6m treatment visit [attended 3m visit and were a response to treatment at 3m]       | 12 week visit                        | 87                                       | Infliximab                                        | 14.4 mg/m <sup>2</sup>        | Both eyes       | Right | 2                | 2                 | 3+                        | 0                          | 294                         | 288                          |
|                                       |                |                                                                                                                      |                                      |                                          |                                                   |                               |                 | Left  | 2                | 2                 | 3+                        | 0.5+                       | 308                         | 240                          |
|                                       | 3              | Completed 6m treatment                                                                                               | 12 week visit                        | 84                                       | Adalimumab                                        | 12.6 mg/m <sup>2</sup>        | Both eyes       | Right | 1                | 1                 | 3+                        | 1+                         | 267                         | 275                          |
|                                       |                |                                                                                                                      |                                      |                                          |                                                   |                               |                 | Left  | 1                | 1                 | 3+                        | 0.5+                       | 272                         | 275                          |
|                                       | 4              | Withdrew from treatment prior to 6m treatment visit [committee assessed patient to be a non-response at 3m]          | Unscheduled visit after 4 week visit | 35                                       | Infliximab <sup>#</sup> ; Adalimumab <sup>#</sup> | 13.2 mg/m <sup>2</sup>        | Right eye       | Right | 8                | 9                 | 3+                        | 0                          | 524                         | 332                          |
|                                       | 5              | Withdrew from treatment prior to 6m treatment visit [committee assessed patient to be a response to treatment at 3m] | Unscheduled visit after 8 week visit | 84                                       | Adalimumab                                        | 10.3 mg/m <sup>2</sup>        | Left eye        | Left  | 0                | 0                 | 2+                        | 0                          | 230                         | 238                          |
|                                       | 6              | Non-response after 3m (no treatment WD completed)                                                                    | 12 week visit                        | 84                                       | Adalimumab                                        | 14.3 mg/m <sup>2</sup>        | Both eyes       | Right | 1                | 1                 | 2+                        | 0.5+                       | 281                         | 285                          |
|                                       |                |                                                                                                                      |                                      |                                          |                                                   |                               |                 | Left  | 1                | 1                 | 2+                        | 0.5+                       | 273                         | 270                          |
|                                       | 7              | Completed 6m treatment                                                                                               | 12 week visit                        | 89                                       | Adalimumab                                        | 10 mg/m <sup>2</sup>          | Right eye       | Right | 2                | 4                 | 4+                        | 1+                         | 238                         | 297                          |
|                                       | 8              | Completed 6m treatment                                                                                               | 12 week visit                        | 84                                       | Adalimumab                                        | 12.5 mg/m <sup>2</sup>        | Left eye        | Left  | 3                | 3                 | 4+                        | 0.5+                       | 243                         | 296                          |
| <b>Partial responders<sup>2</sup></b> | 1              | Non-response at 3m treatment visit                                                                                   | 12 week visit                        | 84                                       | Adalimumab                                        | 10.3 mg/m <sup>2</sup>        | Both eyes       | Right | 4                | 2                 | 1+                        | 0.5+                       | Unobtainable                | 290                          |
|                                       |                |                                                                                                                      |                                      |                                          |                                                   |                               |                 | Left  | 4                | 0                 | 1+                        | 0.5+                       | Unobtainable                | 140                          |
|                                       | 2              | Withdrew from treatment prior to 6m treatment visit [committee assessed patient to be a non-response at 3m]          | Unscheduled visit after 8 week visit | 76                                       | Etanercept <sup>#</sup> ; Adalimumab <sup>#</sup> | 13.9 mg/m <sup>2</sup>        | Left eye        | Left  | 1                | 1                 | 1+                        | 0.5+                       | 238                         | 272                          |

|                                   |    |                                                                                                             |                                      |    |                                                   |                               |           |       |   |    |    |      |              |              |
|-----------------------------------|----|-------------------------------------------------------------------------------------------------------------|--------------------------------------|----|---------------------------------------------------|-------------------------------|-----------|-------|---|----|----|------|--------------|--------------|
|                                   | 3  | Non-response at 3m treatment visit                                                                          | 12 week visit                        | 92 | Infliximab                                        | 11.1 mg/m <sup>2</sup>        | Left eye  | Left  | 2 | 2  | 1+ | 0.5+ | 239          | 286          |
| <b>Non-responders<sup>3</sup></b> | 1  | Withdrew from treatment prior to 6m treatment visit [committee assessed patient to be a non-response at 3m] | 4 week visit                         | 26 | Adalimumab                                        | 16.6 mg/m <sup>2</sup>        | Left eye  | Left  | 0 | 5  | 1+ | 3+   | 259          | 267          |
|                                   | 2  | Withdrew from treatment prior to 6m treatment visit [committee assessed patient to be a non-response at 3m] | 8 week visit                         | 56 | Adalimumab                                        | 10 mg/m <sup>2</sup>          | Right eye | Right | 4 | 12 | 1+ | 2+   | 219          | 231          |
|                                   | 3  | Non-response at 3m treatment visit                                                                          | 12 week visit                        | 84 | Infliximab <sup>#</sup> ; Adalimumab <sup>#</sup> | 10.9 mg/m <sup>2</sup>        | Right eye | Right | 3 | 3  | 3+ | 3+   | 289          | Unobtainable |
|                                   | 4  | Non-response at 3m treatment visit                                                                          | 12 week visit                        | 82 | Infliximab <sup>#</sup> ; Adalimumab <sup>#</sup> | 13.9 mg/m <sup>2</sup>        | Both eyes | Right | 4 | 4  | 3+ | 3+   | 380          | 392          |
|                                   |    |                                                                                                             |                                      |    |                                                   |                               | Left      | 4     | 4 | 2+ | 3+ | 361  | 350          |              |
|                                   | 5  | Non-response at 3m treatment visit                                                                          | 12 week visit                        | 91 | Adalimumab                                        | 12.8 mg/m <sup>2</sup>        | Right eye | Right | 3 | 3  | 2+ | 2+   | 324          | 312          |
|                                   | 6  | Non-response at 3m treatment visit                                                                          | 12 week visit                        | 84 | Adalimumab                                        | 12.5 mg/m <sup>2</sup>        | Both eyes | Right | 3 | 3  | 3+ | 3+   | 241          | Unobtainable |
|                                   |    |                                                                                                             |                                      |    |                                                   |                               | Left      | 0     | 0 | 2+ | 3+ | 247  | Unobtainable |              |
|                                   | 7  | Non-response at 3m treatment visit                                                                          | 12 week visit                        | 91 | Adalimumab                                        | 15.2 mg/m <sup>2</sup>        | Both eyes | Right | 2 | 2  | 3+ | 3+   | 265          | 250          |
|                                   |    |                                                                                                             |                                      |    |                                                   |                               | Left      | 0     | 2 | 3+ | 3+ | 256  | 246          |              |
|                                   | 8  | Withdrew from treatment prior to 6m treatment visit [committee assessed patient to be a non-response at 3m] | Unscheduled visit after 8 week visit | 53 | Adalimumab                                        | 10.5 - 19.9 mg/m <sup>2</sup> | Left eye  | Left  | 3 | 6  | 3+ | 4+   | 313          | 290          |
|                                   | 9  | Non-response at 3m treatment visit                                                                          | 12 week visit                        | 87 | Adalimumab                                        | 10.3 - 12 mg/m <sup>2</sup>   | Left eye  | Left  | 5 | 6  | 4+ | 4+   | 265          | 264          |
|                                   | 10 | Non-response at 3m treatment visit                                                                          | 12 week visit                        | 80 | Adalimumab                                        | 12.5 mg/m <sup>2</sup>        | Right eye | Right | 0 | 4  | 2+ | 2+   | 254          | 220          |

\* 12-week visit or last treatment visit if withdrew from treatment prior to 12-week visit

# Biologics used serially and not together

1 – Achieved 2-step improvement from baseline

2 – Achieved 1-step improvement from baseline only

3 – Did not achieve a 1 or 2-step improvement from baseline

**Supplementary Table 30: APTITUDE Trial Management Group**

| <b>Trial Management Group member</b> | <b>Trial Management Group role</b>            | <b>Organisation</b>                               |
|--------------------------------------|-----------------------------------------------|---------------------------------------------------|
| Professor Athimalaipet Ramanan       | Chief Investigator                            | University Hospitals Bristol NHS Foundation Trust |
| Professor Michael Beresford          | Chief Investigator                            | University of Liverpool                           |
| Professor Andrew Dick                | Co-investigator                               | University of Bristol                             |
| Dr Catherine Guly                    | Co-investigator                               | University Hospitals Bristol NHS Foundation Trust |
| Dr Richard Lee                       | Co-investigator                               | University of Bristol                             |
| Katharine Wale                       | Sponsor Representative                        | University Hospitals Bristol NHS Foundation Trust |
| Debbie Janson                        | Patient and Public Involvement Representative | N/A                                               |
| Dr Ashley Jones                      | Senior Statistician                           | University of Liverpool                           |
| Andrew McKay                         | Trial Statistician                            | University of Liverpool                           |
| Ben Hardwick                         | Supervising Trials Manager                    | University of Liverpool                           |
| Matthew Smyth                        | Trial Manager                                 | University of Liverpool                           |

**Supplementary Table 31: APTITUDE Hospital Sites**

| <b>Hospital site name</b>               | <b>Number of patients registered</b> |
|-----------------------------------------|--------------------------------------|
| Bristol Royal Children's Hospital       | 7                                    |
| Great Ormond Street Hospital            | 6                                    |
| The Great North Children's Hospital     | 3                                    |
| Alder Hey Children's Hospital           | 2                                    |
| Sheffield Children's Hospital           | 2                                    |
| Norfolk and Norwich University Hospital | 1                                    |
| Southampton Children's Hospital         | 1                                    |
